# Supplementary material for: Study on the Polar Extracts of Dendrobium nobile, D. officinale, D. loddigesii, and Flickingeria fimbriata: Metabolite Identification, Content Evaluation, and Bioactivity Assay
Source: MDPI journal article supplement (doi:10.3390/molecules23051185), 2018-05-15
Supplement: s1 [file s1]

## Supplementary Materials

### **Study on the polar extracts of *Dendrobium nobile*, *D. officinale*, *D. loddigesii* and *Flickingeria fimbriata*: metabolite identification, content evaluation and bioactivity assay**

Huiping Chen<sup>1,†</sup>, Xuwen Li<sup>1,†</sup>, Yongli Xu<sup>1</sup>, Kakei Lo<sup>1</sup>, Huizhen Zheng<sup>1</sup>, Haiyan Hu<sup>1,\*</sup>, Jun  
Wang<sup>1\*</sup> and Yongcheng Lin<sup>2</sup>

<sup>1</sup> School of Pharmaceutical Sciences, Sun Yat-sen University, Guangzhou 510006, China

<sup>2</sup> School of Chemistry and Chemical Engineering, Sun Yat-sen University, Guangzhou  
510275, China

\* Corresponding author

E-mail address: [lsshhy@mail.sysu.edu.cn](mailto:lsshhy@mail.sysu.edu.cn) (H-Y. Hu), or, [wjun@mail.sysu.edu.cn](mailto:wjun@mail.sysu.edu.cn) (J. Wang)

† Those authors contribute equally to this work.

## Figure Legends:

**Figure S1.** Structures of **1–8** and their target protons (a–g) for content determination

**Figure S2**  $^1\text{H}$  NMR for flifimdioside A (**1**) from *F. fimbriata*

**Figure S3**  $^{13}\text{C}$  NMR for flifimdioside A (**1**) from *F. fimbriata*

**Figure S4**  $^1\text{H}$ - $^1\text{H}$  COSY for flifimdioside A (**1**) from *F. fimbriata*

**Figure S5** HSQC for flifimdioside A (**1**) from *F. fimbriata*

**Figure S6** HMBC for flifimdioside A (**1**) from *F. fimbriata*

**Figure S7** HRMS spectrometry for flifimdioside A (**1**) from *F. fimbriata*

**Figure S8** ECD spectrum for flifimdioside A (**1**) from *F. fimbriata*

**Figure S9**  $^1\text{H}$  NMR for flickinflimoside B (**2**) from *F. fimbriata*

**Figure S10**  $^1\text{H}$  NMR for syringaresinol-4'-O-D-glucopyranoside (**3**) from *F. fimbriata*

**Figure S11**  $^1\text{H}$  NMR for anosmine (**4**) from *D. nobile*

**Figure S12**  $^1\text{H}$  NMR for malic acid (**5**) from *D. officinale*

**Figure S13**  $^1\text{H}$  NMR for compound (**6**) from *D. officinale*

**Figure S14**  $^{13}\text{C}$ -NMR for compound (**6**) from *D. officinale*

**Figure S15**  $^{13}\text{C}$ -NMR for compound (**6**) from *F. fimbriata*

**Figure S16**  $^1\text{H}$  NMR for mixture of three fructose isomer (**7**) from *D. officinale*

**Figure S17**  $^{13}\text{C}$  NMR the mixture of three fructose isomer (**7**) from *D. officinale*

**Figure S18**  $^1\text{H}$  NMR for shihunine (**8**) from *D. loddigesii*

**Figure S19**  $^1\text{H}$  NMR of polar-extract-f for content determination

**Figure S20**  $^1\text{H}$  NMR of polar-extract-n for content determination

**Figure S21**  $^1\text{H}$  NMR of polar-extract-o for content determination

**Figure S22**  $^{13}\text{C}$  NMR of polar-extract-o for content determination

**Figure S23**  $^1\text{H}$  NMR of polar-extract-l for content determination

**Figure S24**  $^1\text{H}$  NMR of salicylic acid for an external standard

All NMR data were recorded in  $\text{CD}_3\text{OD}$ .

**Figure S25** The inhibitory activities of the polar extracts on  $\alpha$ -glucosidase

**Figure S26** The inhibitory activities of isolated metabolites on  $\alpha$ -glucosidase

**Table S1** The chemical shifts and splitting patterns of diagnostic signals of isolated metabolites

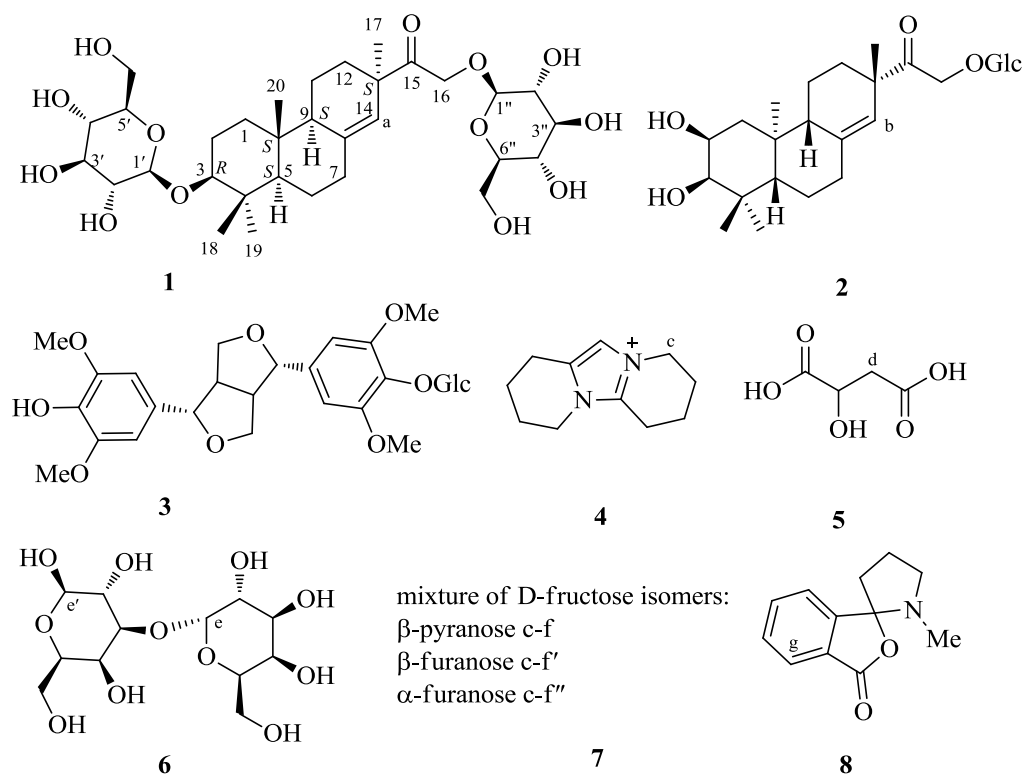

**Figure S1.** Structures of **1–8** and their target protons (a–g) for content determination.

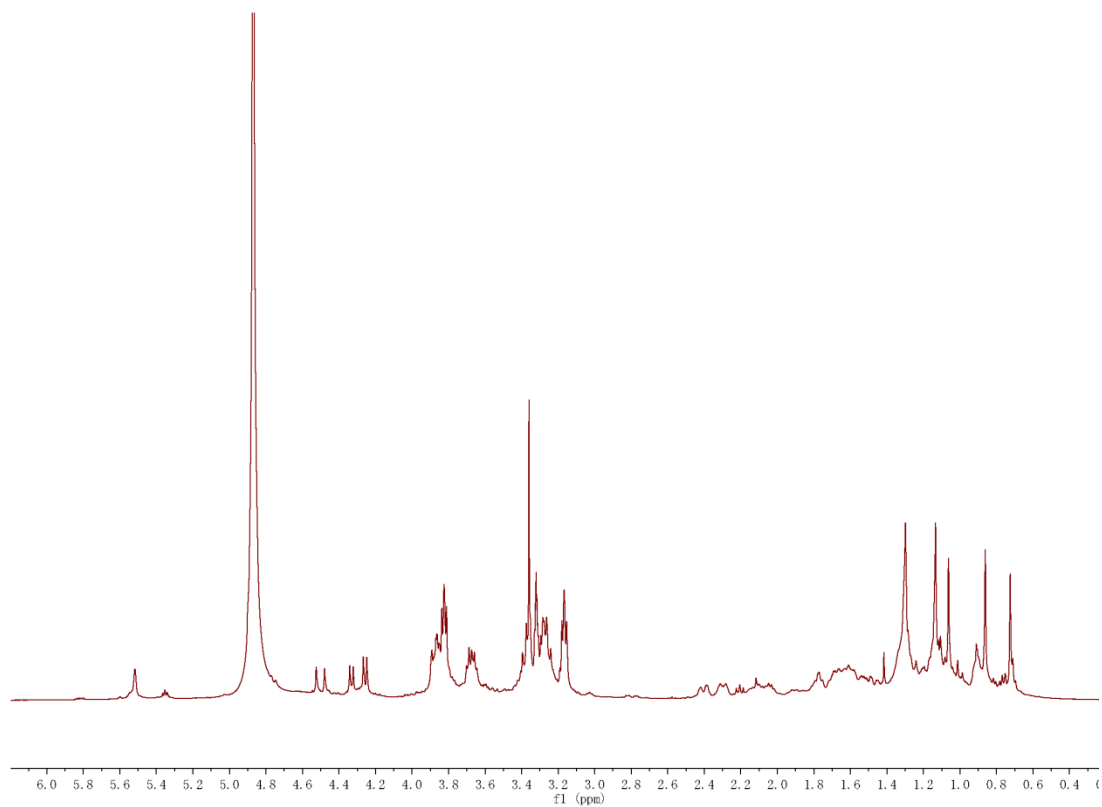

**Figure S2**  $^1\text{H}$  NMR for flifimdioside A (**1**) from *F. fimbriata*

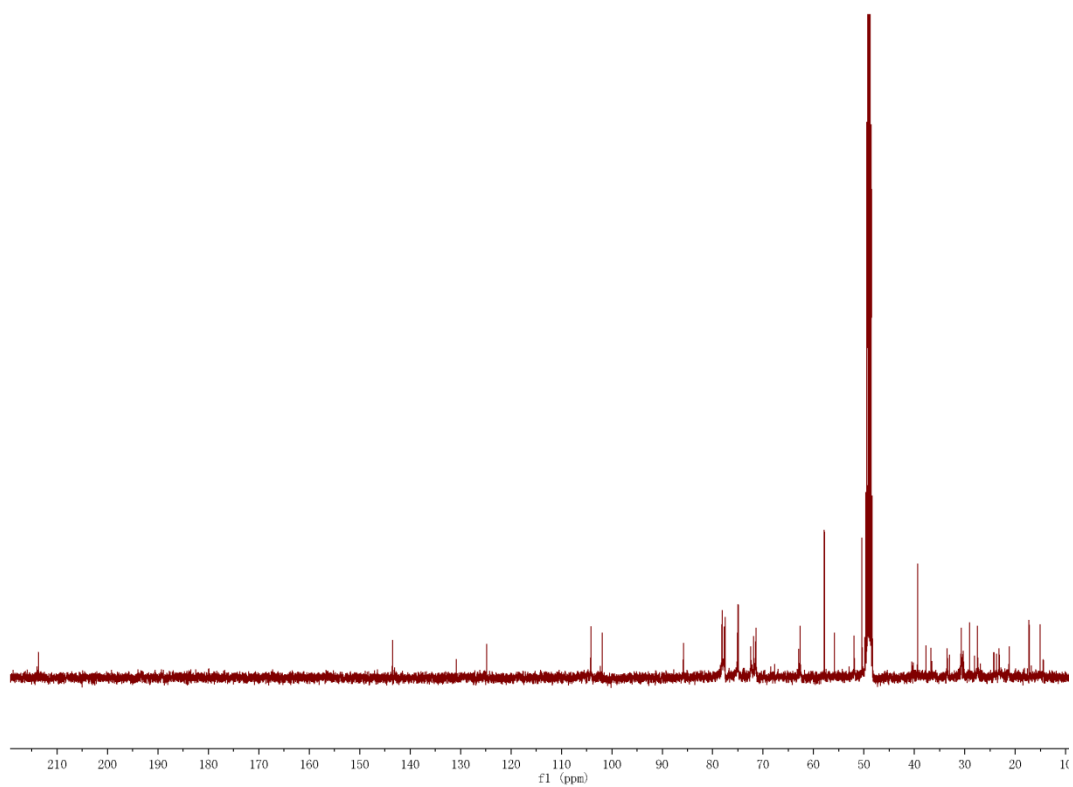

**Figure S3**  $^{13}\text{C}$  NMR for flifimdioside A (**1**) from *F. fimbriata*

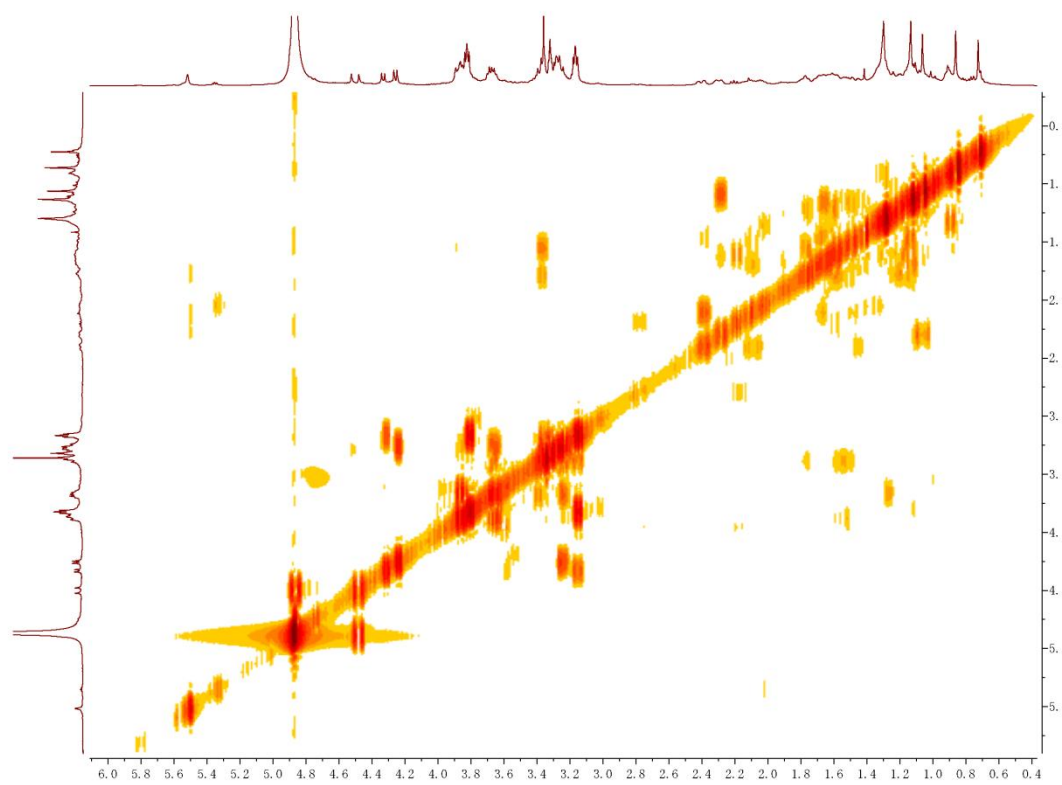

**Figure S4**  $^1\text{H}$ - $^1\text{H}$  COSY for flifimdioside A (**1**) from *F. fimbriata*

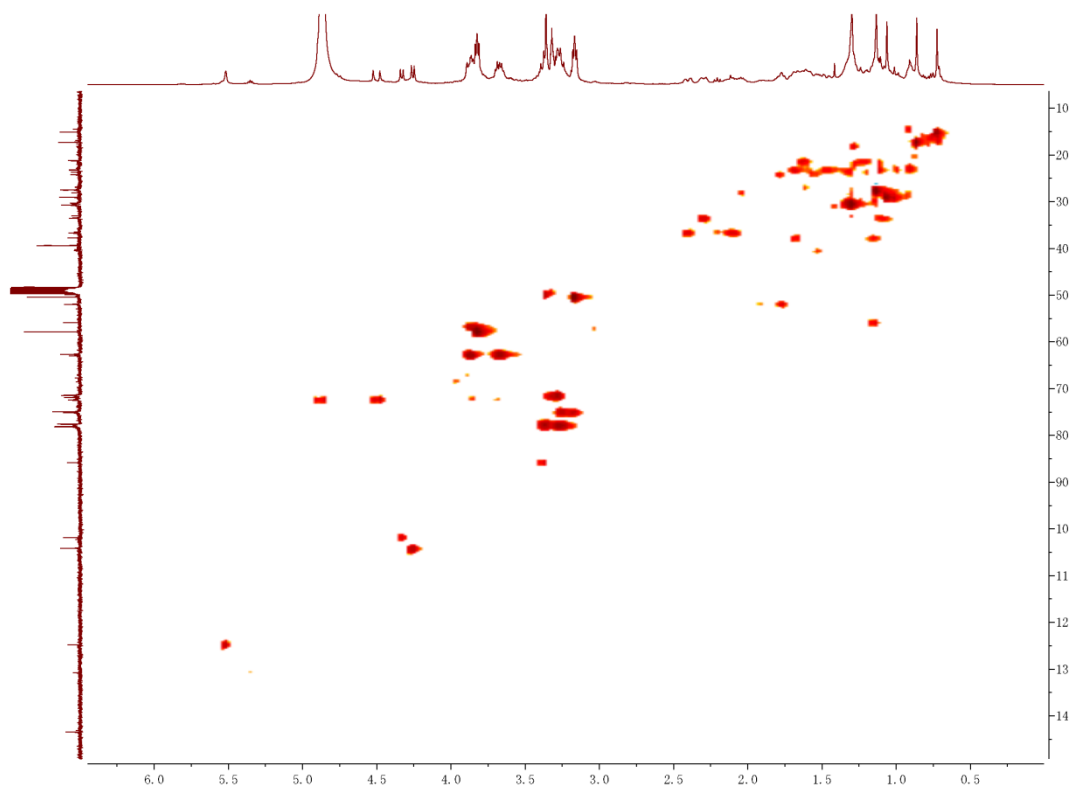

**Figure S5** HSQC for flifimdioside A (**1**) from *F. fimbriata*

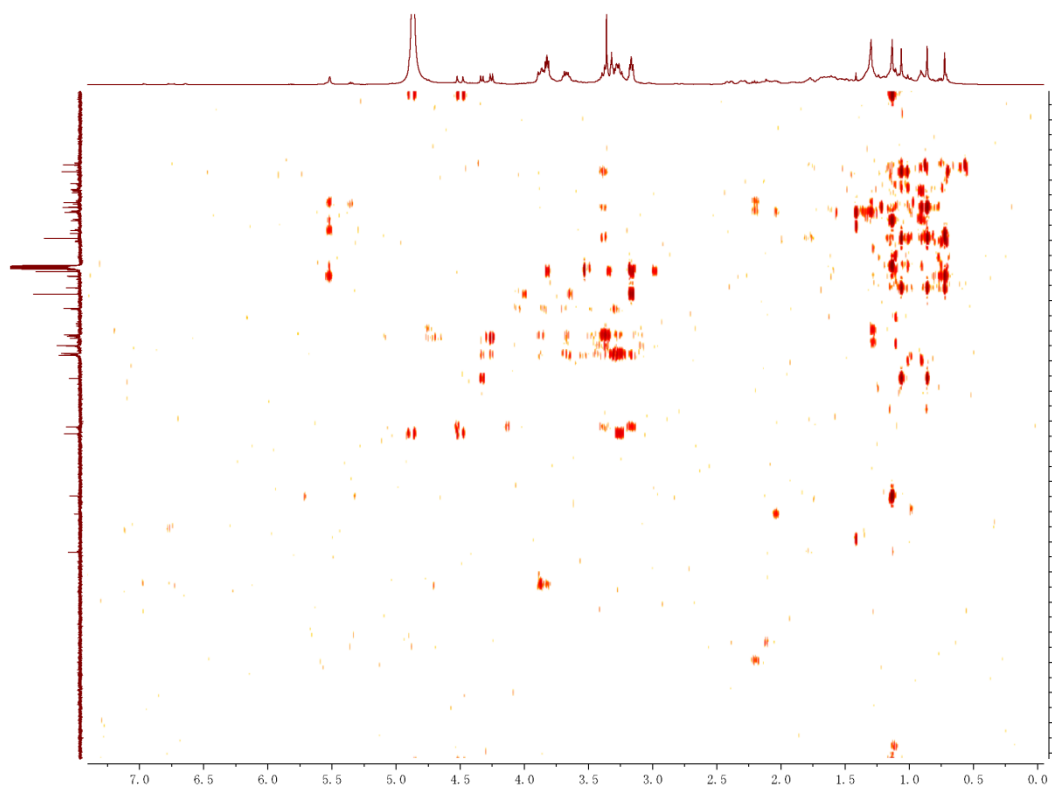

**Figure S6** HMBC for flifimdioside A (**1**) from *F. fimbriata*

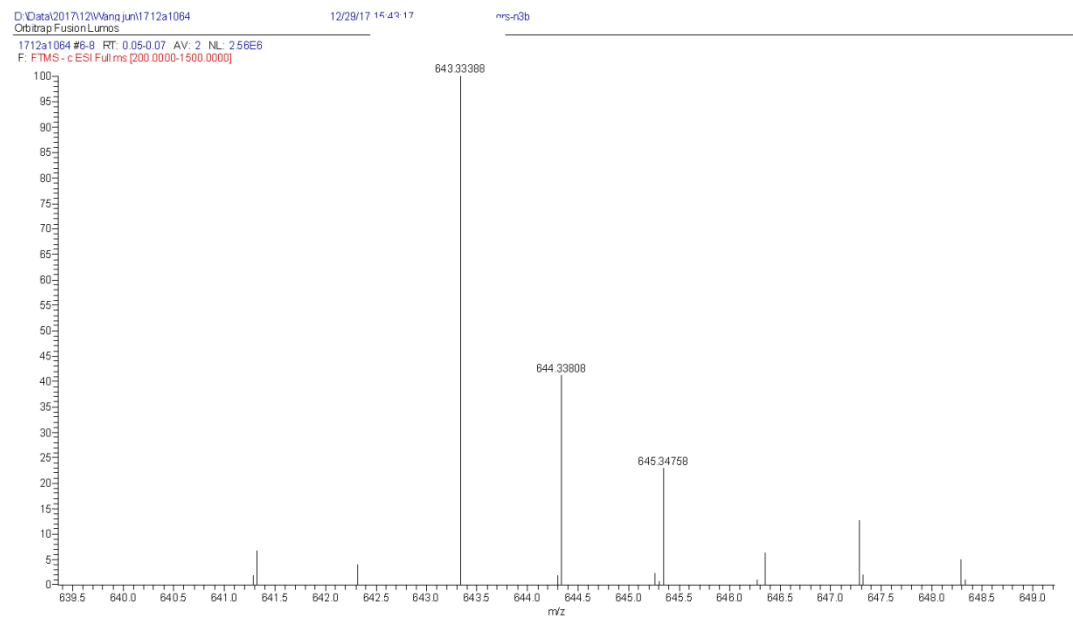

SPECTRUM - simulation :

| m/z       | Theo. Mass | Delta (ppm) | RDB equiv. | Composition |
|-----------|------------|-------------|------------|-------------|
| 643.33388 | 643.33351  | 0.57        | 7.5        | C32 H51 O13 |

Limits:

- 1) Charge: -1
- 2) Nitrogen-role: Do not use
- 3) Mass tolerance: 5 ppm
- 4) Element in use:  $^{12}\text{C}$ (0~35),  $^1\text{H}$ (0~60),  $^{16}\text{O}$ (0~15)

**Figure S7** HRMS spectrometry for flifimdioside A (**1**) from *F. fimbriata*

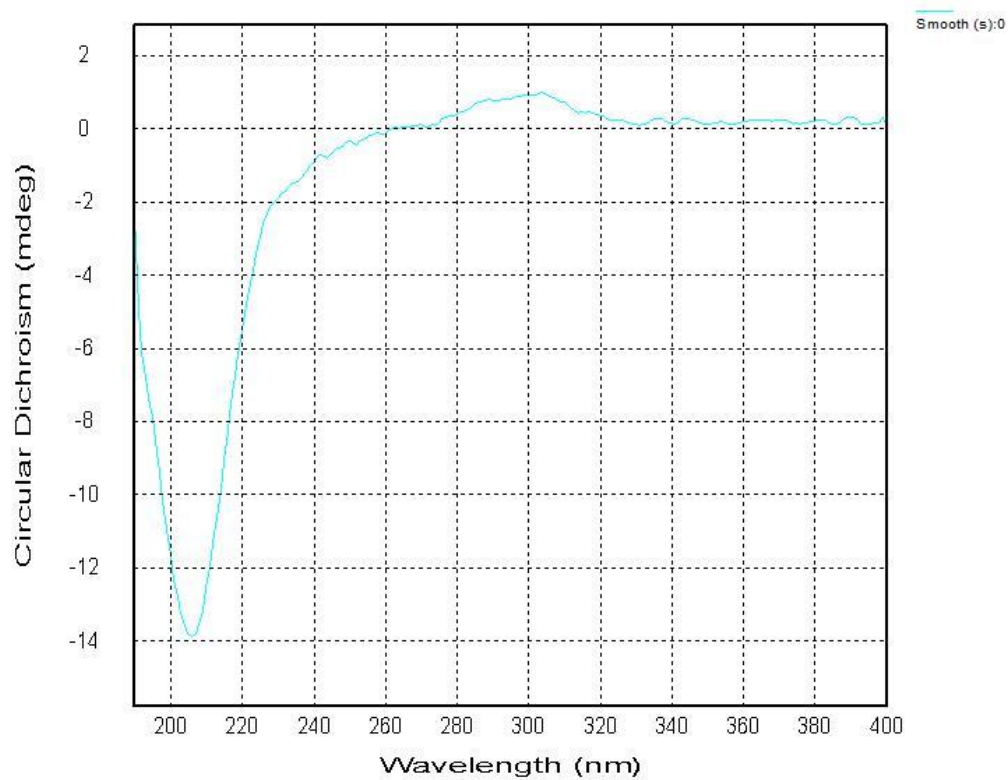

**Figure S8** ECD spectra for flifimdioside A (**1**) from *F. fimbriata*

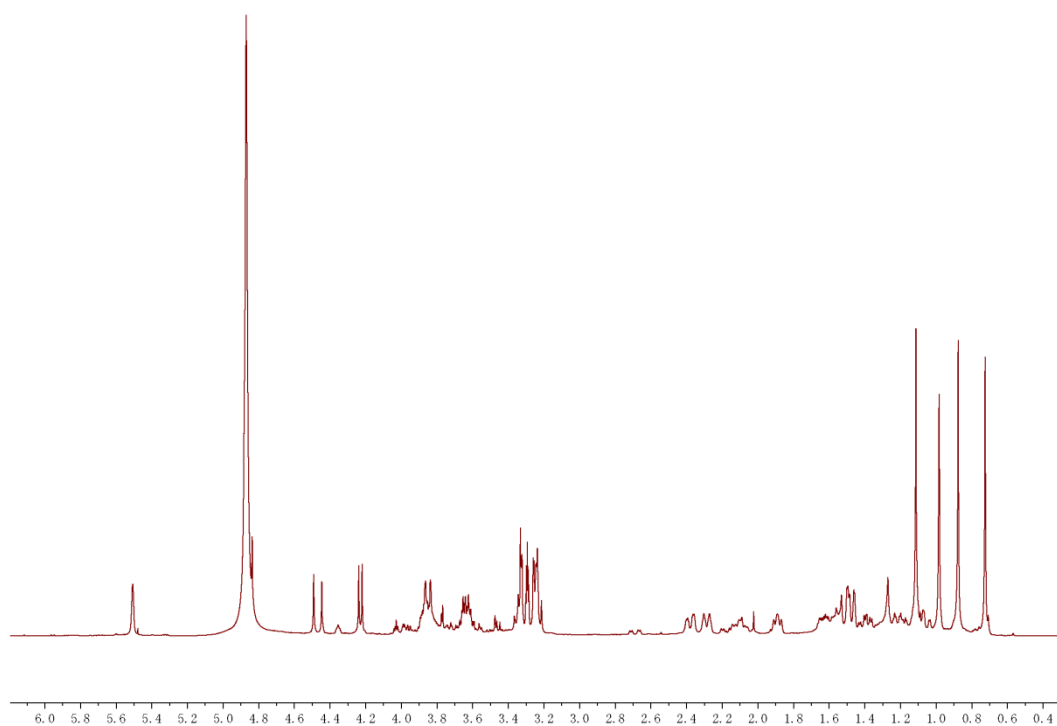

**Figure S9**  $^1\text{H}$  NMR for flickinflimoside B (**2**) from *F. fimbriata*

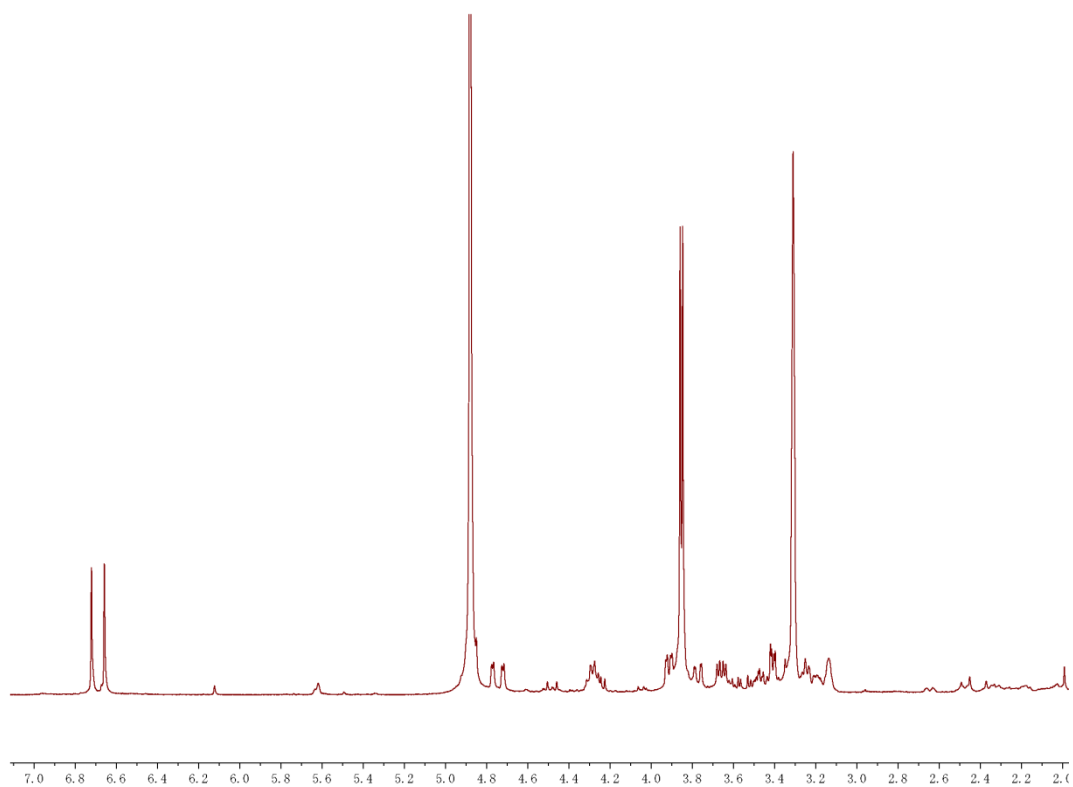

**Figure S10**  $^1\text{H}$  NMR for syringaresinol-4'-O-D-glucopyranoside (**3**) from *F. fimbriata*

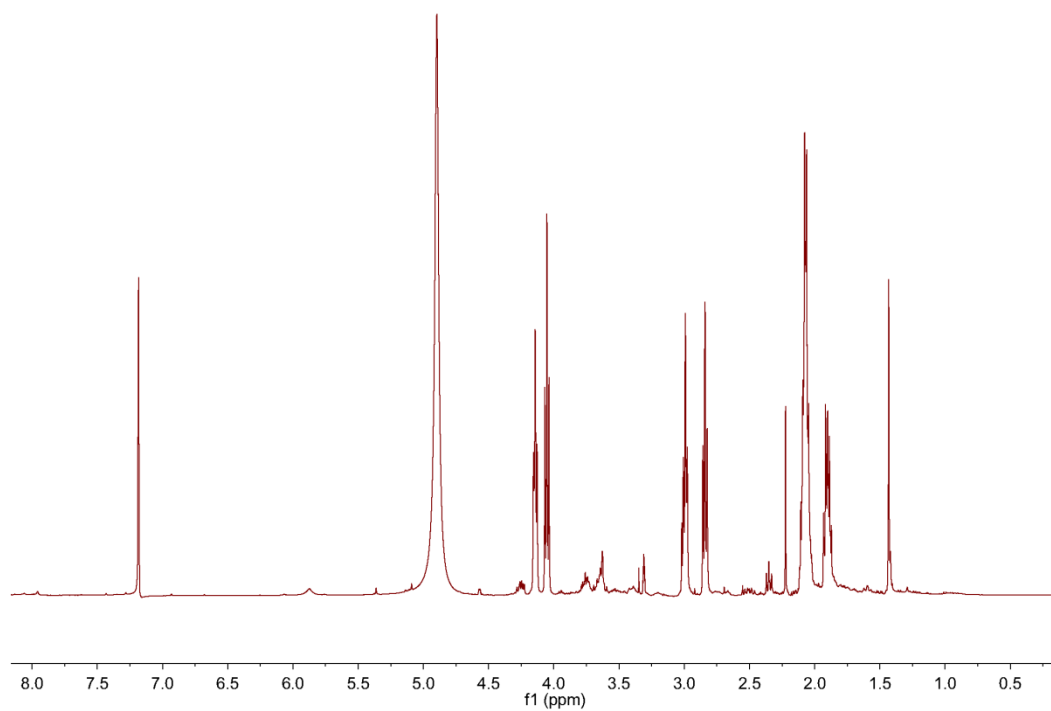

**Figure S11**  $^1\text{H}$  NMR for anosmine (**4**) from *D. nobile*



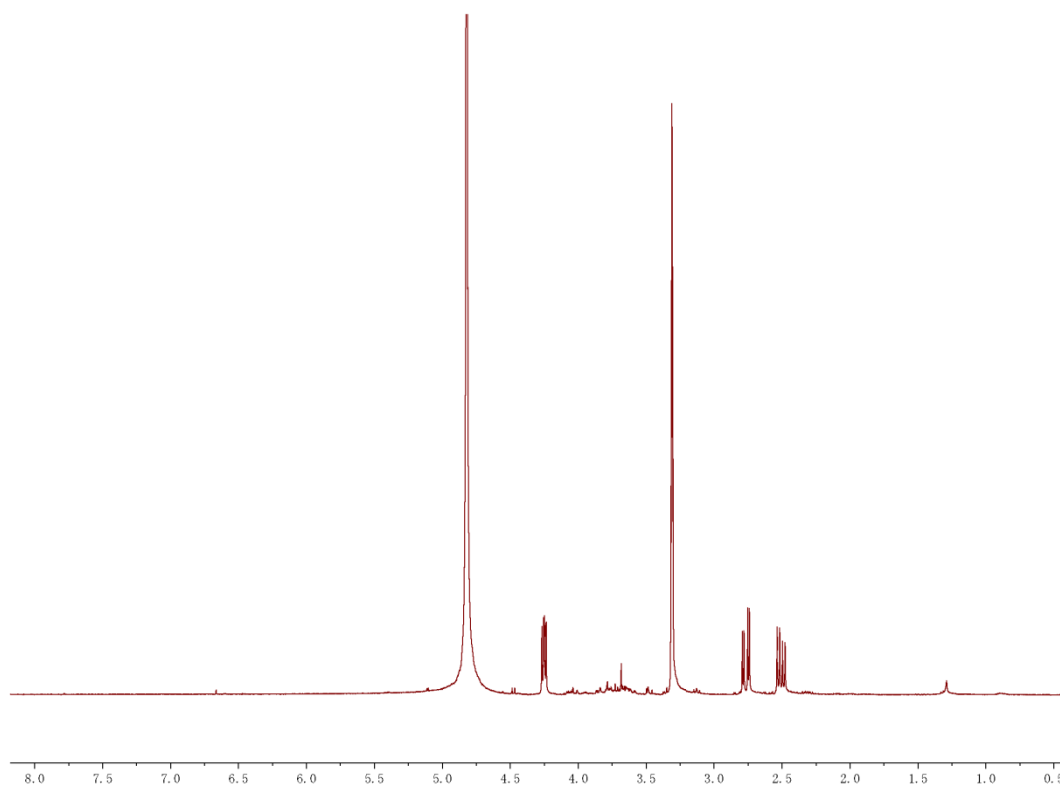

**Figure S12**  $^1\text{H}$  NMR for malic acid (5) from *D. officinale*

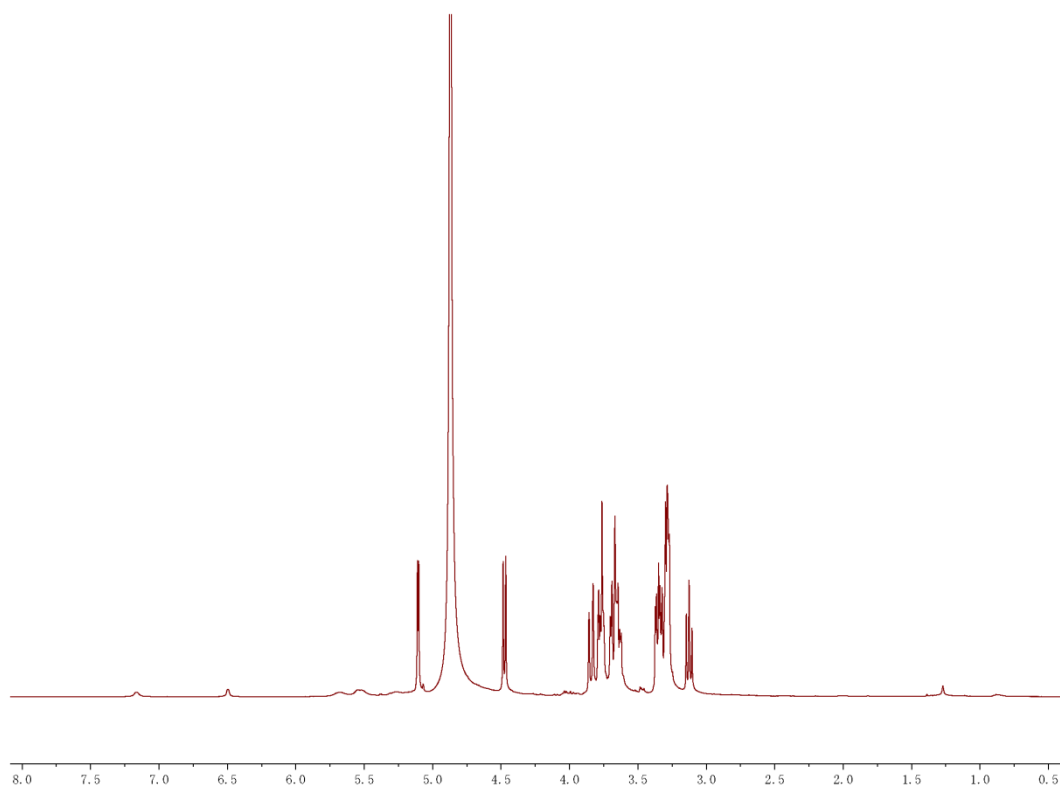

**Figure S13**  $^1\text{H}$  NMR for compound (6) from *D. officinale*

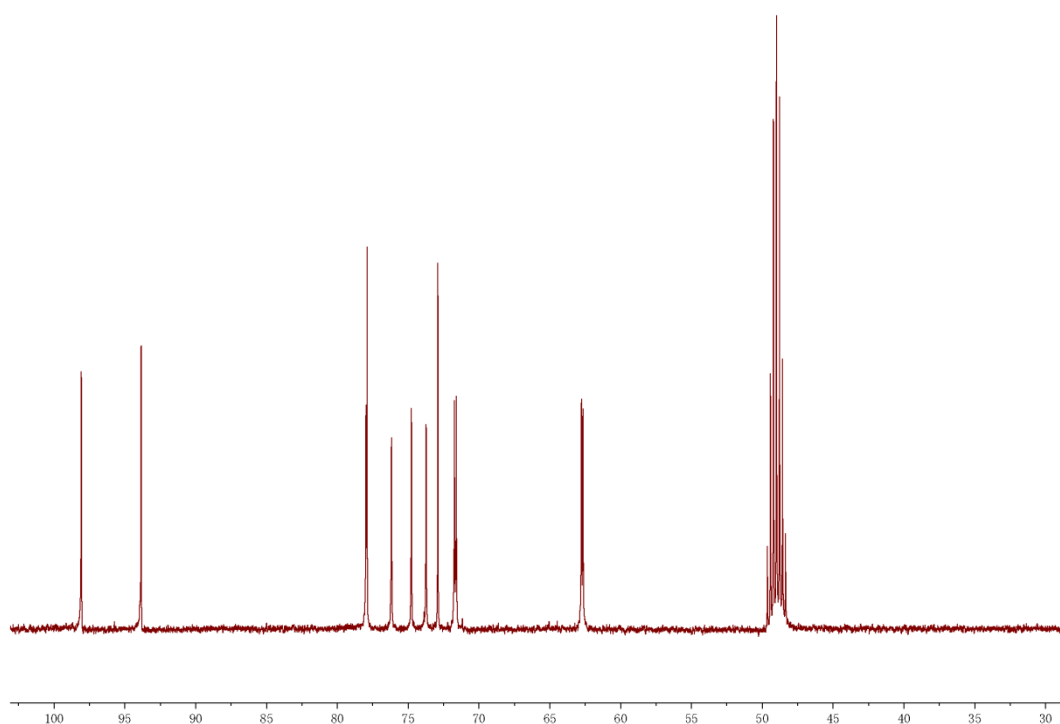

**Figure S14**  $^{13}\text{C}$ -NMR for compound (6) from *D. officinale*

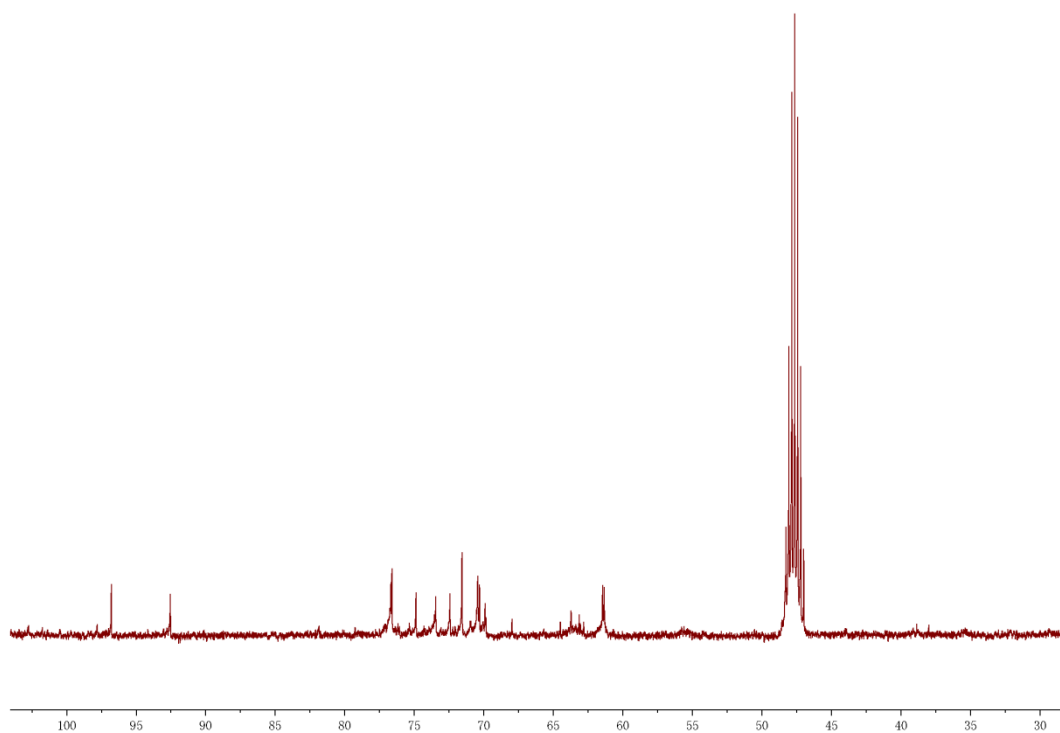

**Figure S15**  $^{13}\text{C}$ -NMR for compound (6) from *F. fimbriata*

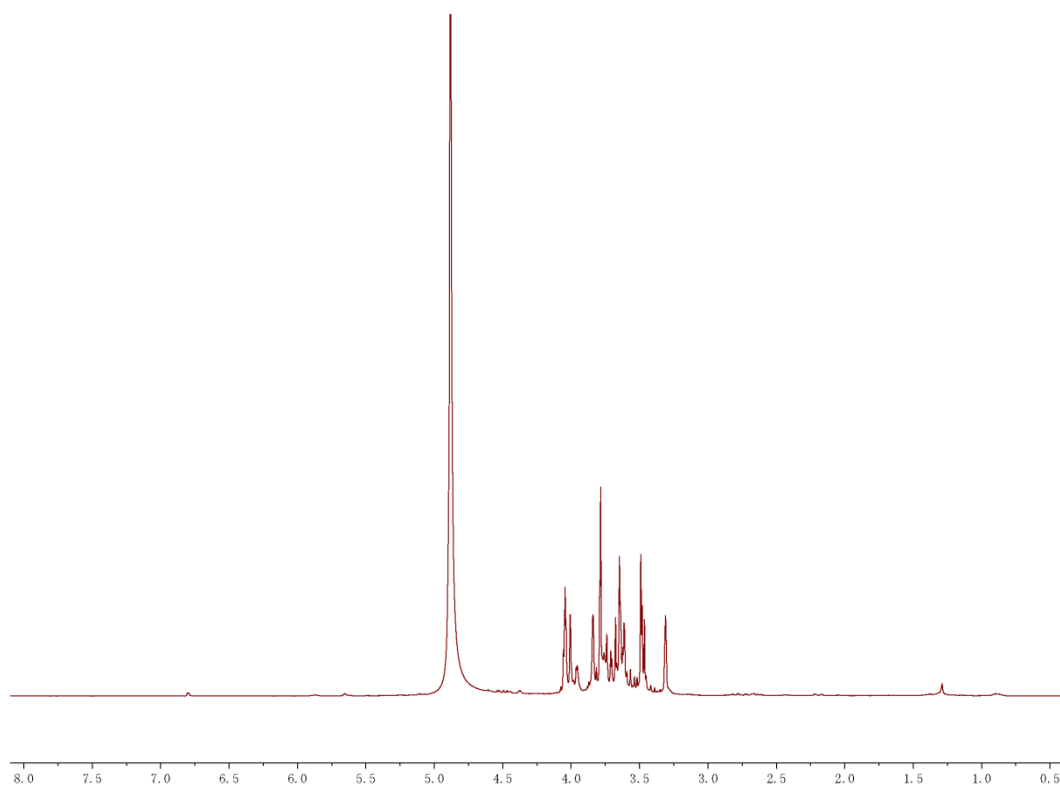

**Figure S16**  $^1\text{H}$  NMR for mixture of three fructose isomer (7) from *D. officinale*

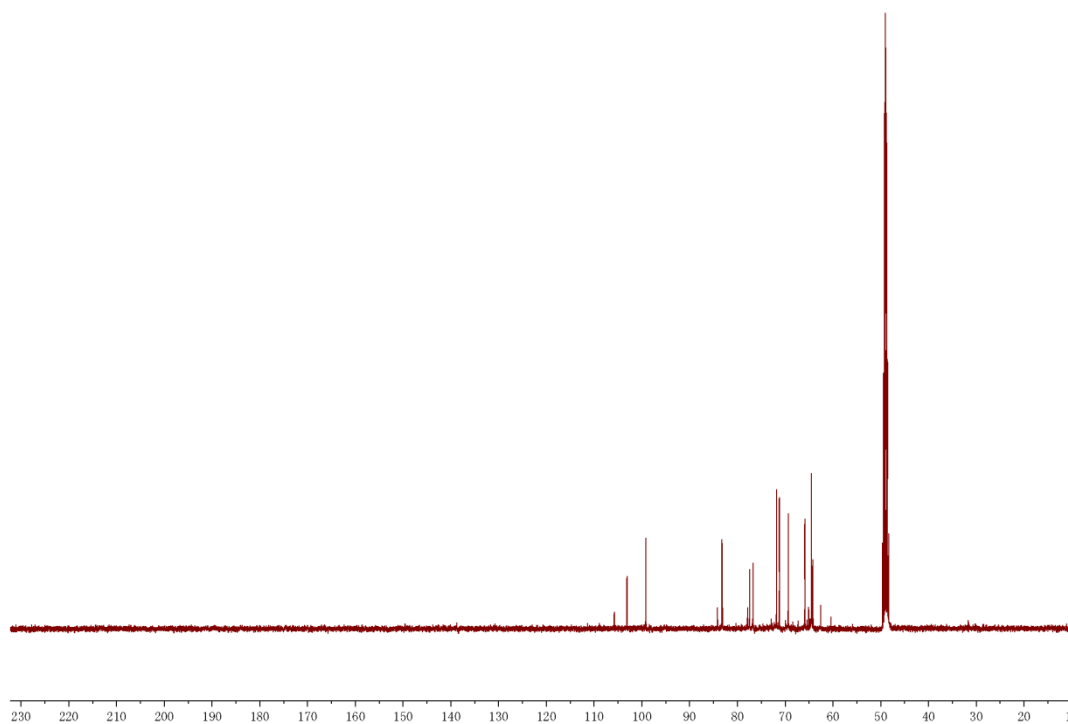

**Figure S17**  $^{13}\text{C}$ -NMR for mixture of three fructose isomer (7) from *D. officinale*

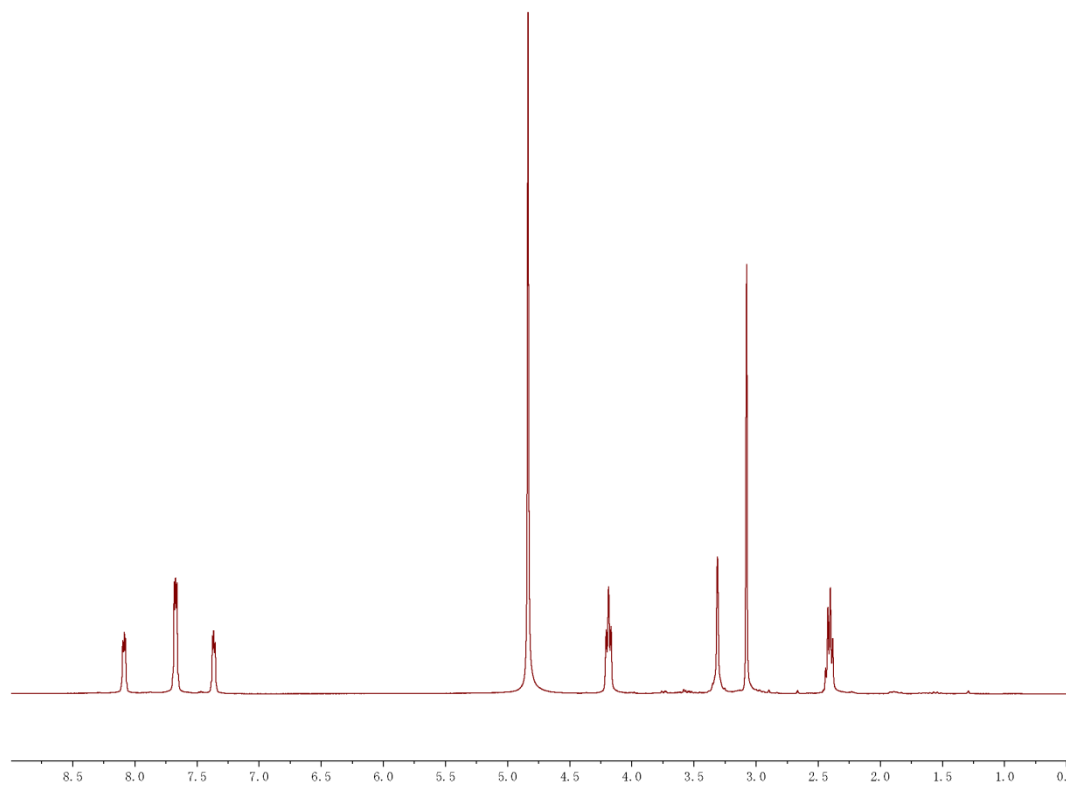

**Figure S18**  $^1\text{H}$  NMR for shihunine (8) from *D. loddigesii*

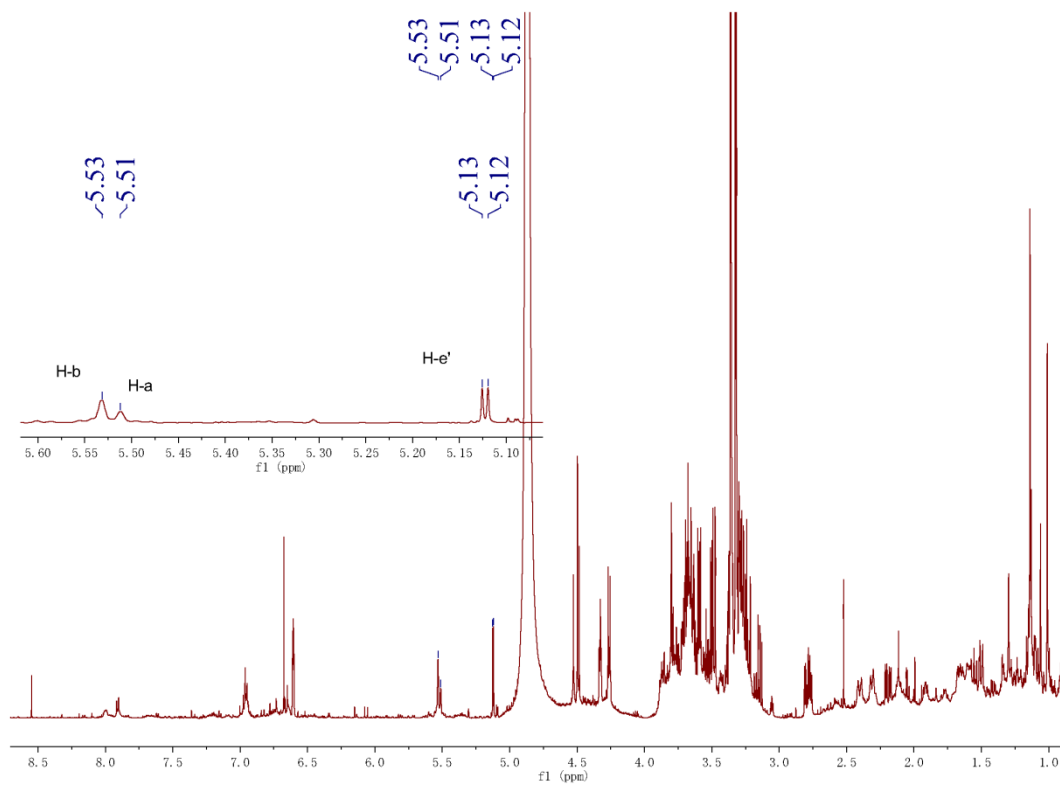

**Figure S19**  $^1\text{H}$  NMR of polar-extract-f for content determination

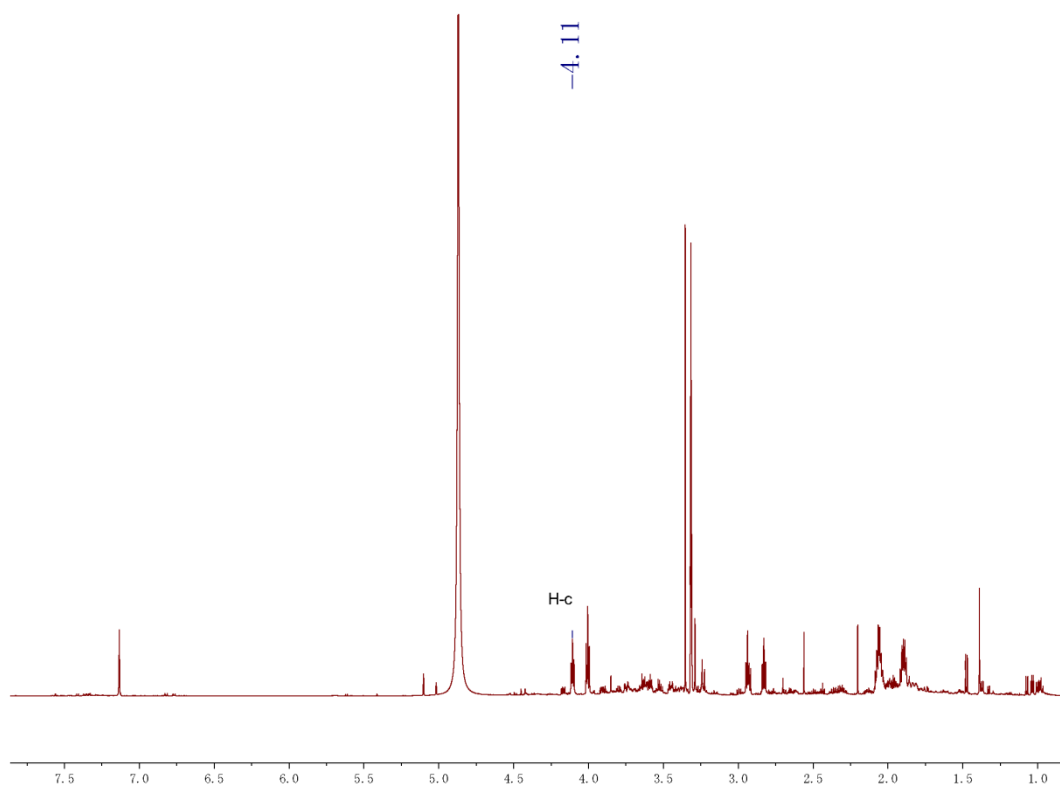

**Figure S20**  $^1\text{H}$  NMR of polar-extract-n for content determination

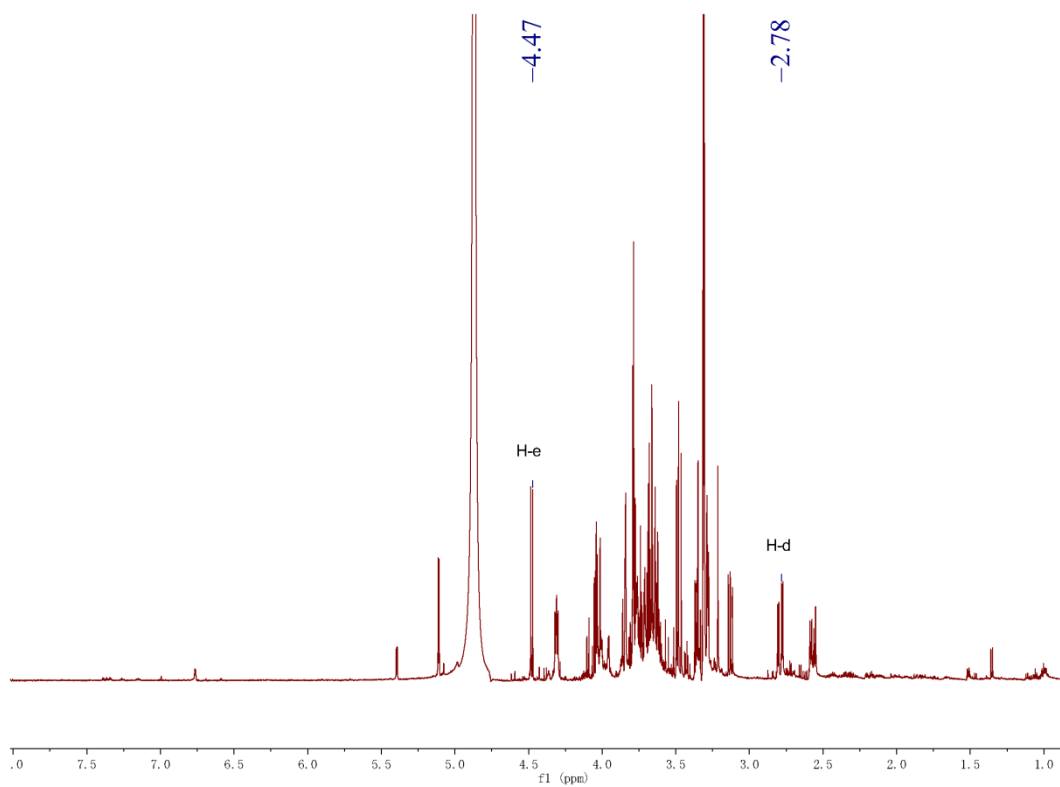

**Figure S21**  $^1\text{H}$  NMR of polar-extract-o for content determination

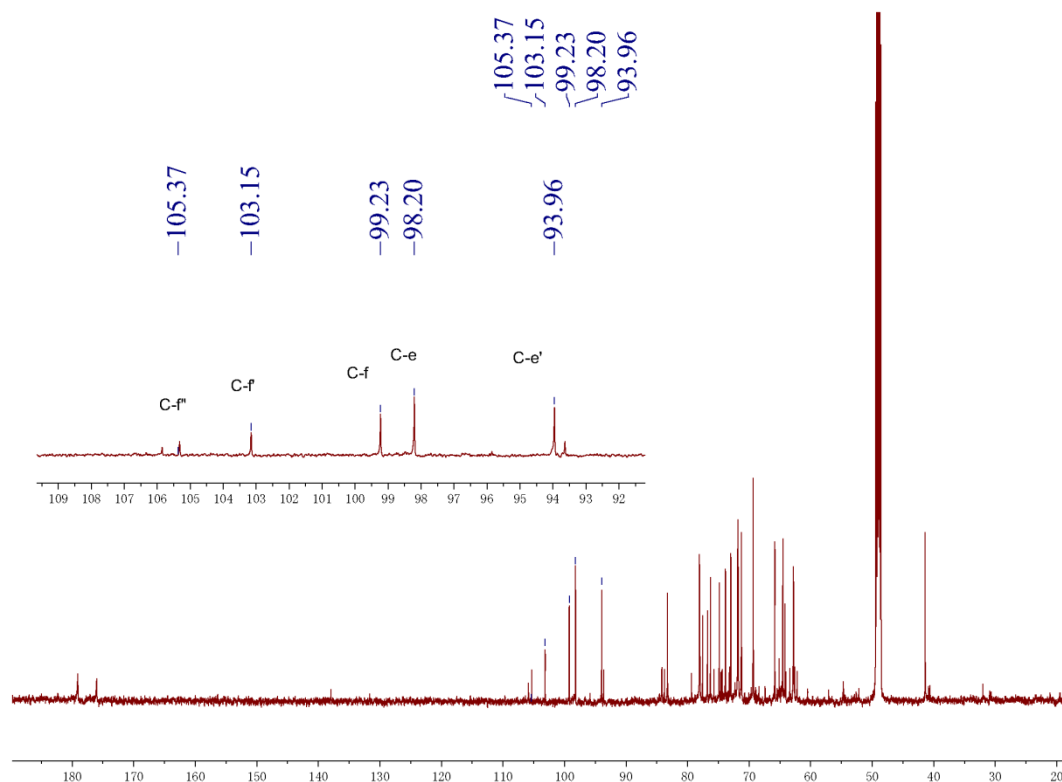

**Figure S22**  $^{13}\text{C}$ -NMR of polar-extract-o for content determination

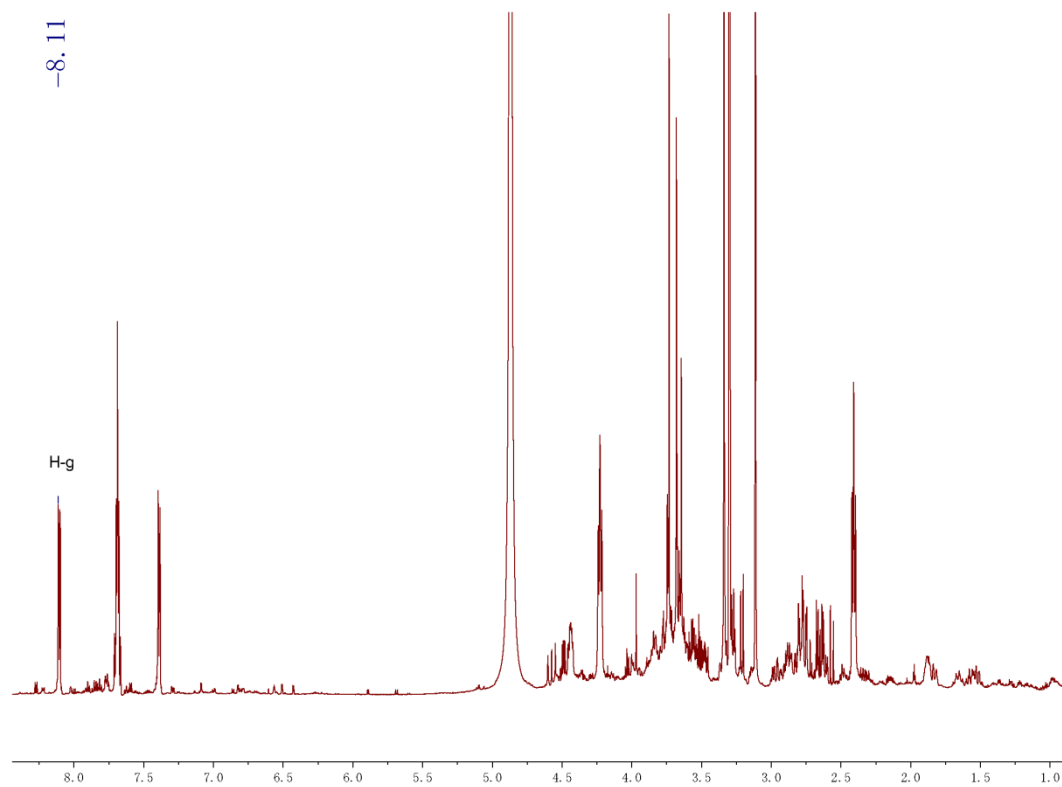

**Figure S23**  $^1\text{H}$  NMR of polar-extract-l for content determination

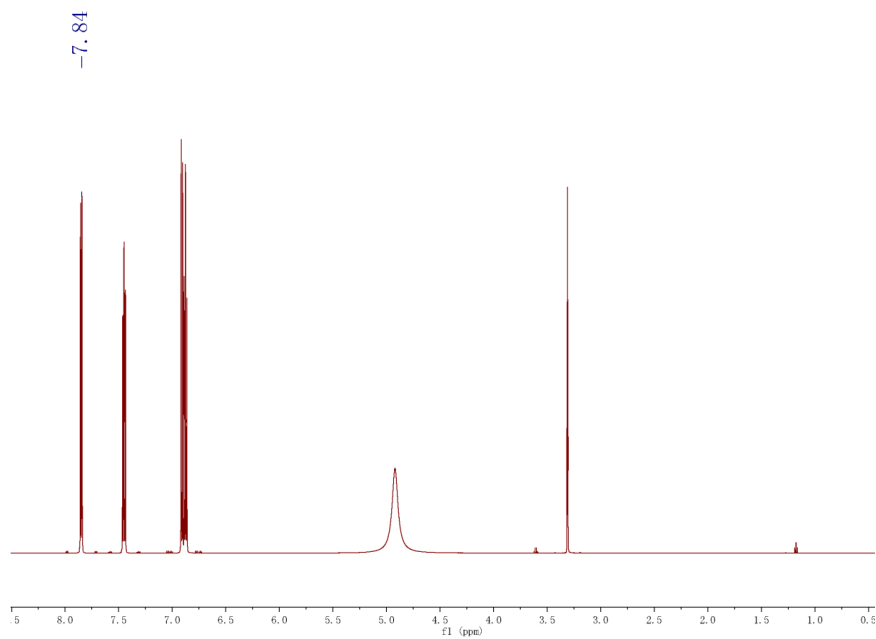

**Figure S24**  $^1\text{H}$  NMR of salicylic acid for an external standard

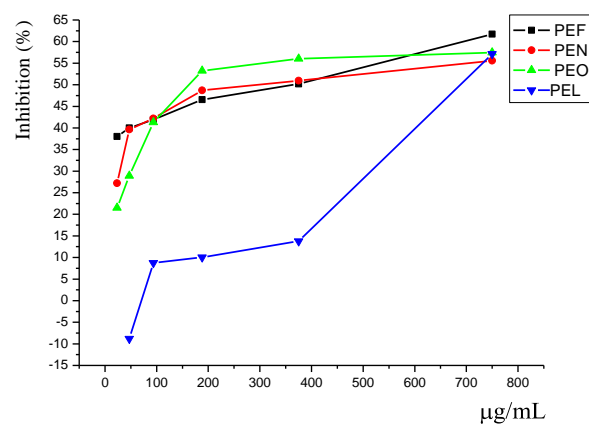

**Figure S25** The inhibitory activities of the polar extracts on  $\alpha$ -glucosidase

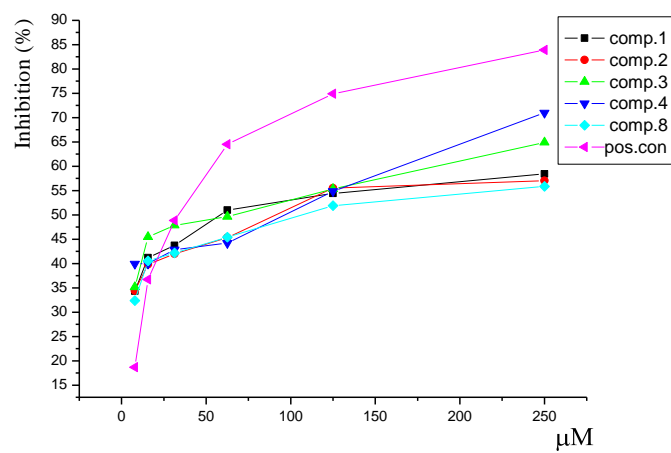

**Figure S26** The inhibitory activities of isolated metabolites on  $\alpha$ -glucosidase

**Table S1.**The chemical shifts and splitting patterns of diagnostic signals of isolated metabolites

| Plant                | Compound                                                                  | Diagnostic signals                                                                                                   |
|----------------------|---------------------------------------------------------------------------|----------------------------------------------------------------------------------------------------------------------|
|                      |                                                                           | $\delta$ (ppm, J, Hz)                                                                                                |
| <i>F. fimbriata</i>  | flifimdioside A ( <b>1</b> )                                              | 5.51 (s, 1H-a), 1.13 (s, 3H), 1.06 (s, 3H), 0.86 (s, 3H), 0.72 (s, 3H).                                              |
|                      | flickinflimoside B ( <b>2</b> )                                           | 5.54 (s, 1H-b), 1.14 (s, 3H), 1.01 (s, 3H), 0.90 (s, 3H), 0.76 (s, 3H).                                              |
|                      | syringaresinol-4'-O-D-glucopyranoside ( <b>3</b> )                        | /                                                                                                                    |
|                      | 3-O- $\beta$ -D-galactopyranosyl- $\beta$ -D-galactopyranose ( <b>6</b> ) | 5.12 (d, 2.4, 1H-e').                                                                                                |
| <i>D. nobile</i>     | anosmine ( <b>4</b> )                                                     | 7.14 (s, 1H), 4.11 (t, 3.6, 2H-c), 4.01 (t, 4.4, 2H), 2.94 (t, 4.4, 2H), 2.83 (t, 4.4, 2H), 2.07 (m 4H), 1.89 (m 4H) |
| <i>D. officinale</i> | malic acid ( <b>5</b> )                                                   | 4.31 (m 1H), 2.78 (dd, 10.8, 3.6, 2H-d), 2.57 (dd, 10.8, 4.8)                                                        |
|                      | 3-O- $\beta$ -D-galactopyranosyl- $\beta$ -D-galactopyranose ( <b>6</b> ) | 5.11 (d, 2.4, 1H-e'), 4.48 (d, 5.2, 1H-e)                                                                            |
|                      | $\beta$ -pyranose ( <b>7</b> )                                            | C-f/99.2 (s)                                                                                                         |
|                      | $\beta$ -furanose ( <b>7</b> )                                            | C-f'/103.1 (s)                                                                                                       |
|                      | $\alpha$ -furanose ( <b>7</b> )                                           | C-f''/105.3 (s)                                                                                                      |
| <i>D. loddigesii</i> | shihunine ( <b>8</b> )                                                    | 8.11 (dd, 4.4, 1.2, 1H-g/), 7.69 (m, 2H), 7.39 (dd, 4.4, 1.2, 1H), 4.23 (t, 5.2, 2H), 2.41 (dd, 5.2, 2H)             |
