# Supplementary material for: Study on the Polar Extracts of Dendrobium nobile, D. officinale, D. loddigesii, and Flickingeria fimbriata: Metabolite Identification, Content Evaluation, and Bioactivity Assay
Source: Molecules. 2018 May 15;23(5):1185. doi: 10.3390/molecules23051185 (PMC6099805; doi:10.3390/molecules23051185)
Supplement: Supplementary file 1 [file molecules-23-01185-s001.zip]

Archive with 32 entries (29 files):
- molecules-287670-supplementary/
- molecules-287670-supplementary/Supplementary Materials/
- molecules-287670-supplementary/Supplementary Materials/figures and table in Supplementary Materials/
- molecules-287670-supplementary/Supplementary Materials/figures and table in Supplementary Materials/Figure S10.tif
- molecules-287670-supplementary/Supplementary Materials/figures and table in Supplementary Materials/Figure S11.tif
- molecules-287670-supplementary/Supplementary Materials/figures and table in Supplementary Materials/Figure S12.tif
- molecules-287670-supplementary/Supplementary Materials/figures and table in Supplementary Materials/Figure S13.tif
- molecules-287670-supplementary/Supplementary Materials/figures and table in Supplementary Materials/Figure S14.tif
- molecules-287670-supplementary/Supplementary Materials/figures and table in Supplementary Materials/Figure S15.tif
- molecules-287670-supplementary/Supplementary Materials/figures and table in Supplementary Materials/Figure S16.tif
- molecules-287670-supplementary/Supplementary Materials/figures and table in Supplementary Materials/Figure S17.tif
- molecules-287670-supplementary/Supplementary Materials/figures and table in Supplementary Materials/Figure S18.tif
- molecules-287670-supplementary/Supplementary Materials/figures and table in Supplementary Materials/Figure S19.tif
- molecules-287670-supplementary/Supplementary Materials/figures and table in Supplementary Materials/Figure S2.tif
- molecules-287670-supplementary/Supplementary Materials/figures and table in Supplementary Materials/Figure S20.tif
- molecules-287670-supplementary/Supplementary Materials/figures and table in Supplementary Materials/Figure S21.tif
- molecules-287670-supplementary/Supplementary Materials/figures and table in Supplementary Materials/Figure S22.tif
- molecules-287670-supplementary/Supplementary Materials/figures and table in Supplementary Materials/Figure S23.tif
- molecules-287670-supplementary/Supplementary Materials/figures and table in Supplementary Materials/Figure S24.tif
- molecules-287670-supplementary/Supplementary Materials/figures and table in Supplementary Materials/figure S25.tif
- molecules-287670-supplementary/Supplementary Materials/figures and table in Supplementary Materials/figure s26.tif
- molecules-287670-supplementary/Supplementary Materials/figures and table in Supplementary Materials/Figure S3.tif
- molecules-287670-supplementary/Supplementary Materials/figures and table in Supplementary Materials/Figure S4.tif
- molecules-287670-supplementary/Supplementary Materials/figures and table in Supplementary Materials/Figure S5.tif
- molecules-287670-supplementary/Supplementary Materials/figures and table in Supplementary Materials/Figure S6.tif
- molecules-287670-supplementary/Supplementary Materials/figures and table in Supplementary Materials/Figure S7.tif
- molecules-287670-supplementary/Supplementary Materials/figures and table in Supplementary Materials/Figure S8.jpg
- molecules-287670-supplementary/Supplementary Materials/figures and table in Supplementary Materials/Figure S9.tif
- molecules-287670-supplementary/Supplementary Materials/figures and table in Supplementary Materials/Table S1.docx
- molecules-287670-supplementary/Supplementary Materials/figures and table in Supplementary Materials/Supplementary Materials.docx
- molecules-287670-supplementary/Supplementary Materials/figures and table in Supplementary Materials/fig s1.tif
- molecules-287670-supplementary/Supplementary Materials/Supplementary Materials.pdf
